# Supplementary material for: Visual system development of the spotted unicornfish, Naso brevirostris (Acanthuridae)
Source: Oxford University Press journal article supplement (doi:10.1242/jeb.209916), 2019-01-01
Supplement: jeb209916supp.pdf [file jeb209916supp.pdf]

## Supplementary Material

**Table S1** Summary of the stereology parameters used for the analysis of ganglion cell and photoreceptor cell distributions along with Schaeffer's coefficient of error (CE).

| <b>Ganglion cells</b> |            |        |               |                               |               |          |                |
|-----------------------|------------|--------|---------------|-------------------------------|---------------|----------|----------------|
| Stage                 | Individual | SL, cm | Lens Ø,<br>mm | Counting<br>Frame size,<br>µm | Grid size, µm | Site No. | Schaeffer's CE |
| Adult                 | ID1        | 30.6   | 6.6           | 90 x 90                       | 1350 x 1350   | 219      | 0.042          |
|                       | ID2        | 30.8   | 6.9           | 90 x 90                       | 1350 x 1350   | 238      | 0.041          |
| Juvenile              | ID1        | 13.8   | 4.7           | 80 x 80                       | 1000 x 1000   | 225      | 0.042          |
|                       | ID2        | 15.2   | 4.9           | 80 x 80                       | 1000 x 1000   | 209      | 0.041          |
|                       | ID3        | 15.7   | 4.5           | 80 x 80                       | 1000 x 1000   | 185      | 0.042          |
| Larval                | ID1        | 3.18   | 1.4           | 50 x 50                       | 250 x 250     | 205      | 0.034          |
| <b>Photoreceptors</b> |            |        |               |                               |               |          |                |
| Stage                 | Individual | SL, cm | Lens Ø,<br>mm | Counting<br>Frame size,<br>µm | Grid size, µm | Site N   | Schaeffer's CE |
| Adult                 | ID3        | 29.7   | 6.8           | 90 x 90                       | 1450 x 1450   | 207      | 0.047          |
|                       | ID4        | 27.7   | 6.4           | 90 x 90                       | 1450 x 1450   | 185      | 0.050          |
| Juvenile              | ID3        | 13.8   | 4.5           | 80 x 80                       | 950 x 950     | 195      | 0.045          |
|                       | ID4        | 18.5   | 5.6           | 80 x 80                       | 950 x 950     | 210      | 0.054          |
| Larval                | ID2        | 3.08   | 1.6           | 45 x 45                       | 340 x 340     | 216      | 0.051          |
|                       | ID3        | 3.30   | 1.5           | 45 x 45                       | 340 x 340     | 208      | 0.053          |

SL = standard length; Ø = diameter.

**Table S2: Summary of transcriptomes of *N. brevis*, opsin mapping (incl. base pair coverage), and proportional opsin gene expression.***RH1* = rod opsin, *SWS2* = short-wavelength sensitive 2, *RH2* = rhodopsin like 2, *LWS* = long-wavelength sensitive

|               |             | RNA sequencing       |                   |                   | Mapping            |                      |                     |                     |                    | Proportional opsin expression % (normalized to coding sequence length) |             |              |             |             |            |
|---------------|-------------|----------------------|-------------------|-------------------|--------------------|----------------------|---------------------|---------------------|--------------------|------------------------------------------------------------------------|-------------|--------------|-------------|-------------|------------|
| Transcriptome |             | Rod                  | Single cones (SC) |                   | Double cones (DC)  |                      |                     | Rod vs Cone         |                    | SC                                                                     | DC          |              |             |             |            |
| Stage         | ID          | Standard length (cm) | # raw reads       | # filtered reads  | <i>RH1</i> # reads | <i>SWS2B</i> # reads | <i>RH2B</i> # reads | <i>RH2A</i> # reads | <i>LWS</i> # reads | R                                                                      | C           | <i>SWS2B</i> | <i>RH2B</i> | <i>RH2A</i> | <i>LWS</i> |
| Larval        | L19         | 3.18                 | 25,789,980        | 22,792,356        | 1,178,462          | 35,634               | 39,634              | 98,812              | 188                | 87.1                                                                   | 12.9        | 100          | 28.5        | 71.4        | 0.1        |
|               | L20         | 3.07                 | 24,433,162        | 21,718,144        | 1,125,563          | 35,125               | 46,386              | 84,954              | 158                | 87.1                                                                   | 12.9        | 100          | 35.2        | 64.7        | 0.1        |
|               | L26         | 3.07                 | 25,820,192        | 22,996,270        | 1,066,043          | 47,843               | 118,750             | 143,946             | 602                | 77.4                                                                   | 22.6        | 100          | 45          | 54.8        | 0.2        |
|               | <i>Mean</i> |                      | <b>25,347,778</b> | <b>22,502,257</b> | <b>1,123,356</b>   | <b>39,534</b>        | <b>68,257</b>       | <b>109,237</b>      | <b>316</b>         | <b>83.9</b>                                                            | <b>16.1</b> | <b>100</b>   | <b>36.2</b> | <b>63.6</b> | <b>0.2</b> |
|               | <i>Se</i>   |                      | <b>457,391</b>    | <b>396,451</b>    | <b>32,471</b>      | <b>4,157</b>         | <b>25,321</b>       | <b>17,809</b>       | <b>143</b>         | <b>3.23</b>                                                            |             | <b>-</b>     | <b>4.8</b>  | <b>4.8</b>  | <b>0.0</b> |
| Juvenile      | FD8         | 6.5                  | 14,854,726        | 13,176,755        | 679,634            | 39,829               | 88,651              | 57,481              | 3,005              | 78.2                                                                   | 21.8        | 100          | 59.3        | 38.7        | 2          |
|               | SRG1        | 15.5                 | 9,043,423         | 7,458,565         | 365,928            | 17,873               | 34,235              | 25,225              | 2,333              | 82.1                                                                   | 17.9        | 100          | 55.3        | 41          | 3.7        |
|               | SRG21       | 19.5                 | 9,895,137         | 6,536,514         | 631,856            | 6,452                | 15,656              | 10,926              | 786                | 94.9                                                                   | 5.1         | 100          | 57.1        | 40.1        | 2.8        |
|               | SRG22       | 15.2                 | 12,990,170        | 11,708,074        | 612,536            | 11,203               | 17,282              | 13,292              | 1,887              | 93.3                                                                   | 6.7         | 100          | 53.1        | 41.1        | 5.8        |
|               | SRG28       | 14.2                 | 2,914,410         | 2,560,493         | 133,236            | 8,445                | 19,856              | 12,731              | 748                | 76.1                                                                   | 23.9        | 100          | 59.5        | 38.3        | 2.2        |
|               | SRG31_2     | 15.3                 | 20,785,172        | 18,299,205        | 896,430            | 18,684               | 41,142              | 37,840              | 466                | 90.1                                                                   | 9.9         | 100          | 51.7        | 47.7        | 0.6        |
|               | <i>Mean</i> |                      | <b>11,747,173</b> | <b>9,956,601</b>  | <b>553,270</b>     | <b>17,081</b>        | <b>36,137</b>       | <b>26,249</b>       | <b>1,537.5</b>     | <b>85.8</b>                                                            | <b>14.2</b> | <b>100</b>   | <b>56.0</b> | <b>41.2</b> | <b>2.8</b> |
| <i>Se</i>     |             | <b>2,460,660</b>     | <b>2,277,979</b>  | <b>108,772</b>    | <b>4,976</b>       | <b>11,294</b>        | <b>7,519.4</b>      | <b>418.1</b>        | <b>3.3</b>         |                                                                        | <b>-</b>    | <b>1.3</b>   | <b>1.4</b>  | <b>0.7</b>  |            |
| Adult         | SRG2_VT     | 33.0                 | 21,687,092        | 17,535,898        | 1,555,234          | 75,996               | 173,683             | 116,779             | 17,268             | 80.2                                                                   | 19.8        | 100          | 56.3        | 38.1        | 5.6        |
|               | SRG4_VT     | 30.8                 | 13,659,085        | 12,284,294        | 1,454,916          | 72,354               | 94,914              | 56,266              | 8,520              | 86.2                                                                   | 13.8        | 100          | 59.3        | 35.4        | 5.3        |
|               | SRG7_VT     | 30.6                 | 22,826,459        | 18,406,216        | 1,817,211          | 76,589               | 173,392             | 133,336             | 21,603             | 81.8                                                                   | 18.2        | 100          | 52.7        | 40.8        | 6.5        |
|               | <i>Mean</i> |                      | <b>19,390,879</b> | <b>16,075,469</b> | <b>1,609,120</b>   | <b>74,980</b>        | <b>147,330</b>      | <b>102,127</b>      | <b>15,797.0</b>    | <b>82.7</b>                                                            | <b>17.3</b> | <b>100</b>   | <b>56.1</b> | <b>38.1</b> | <b>5.8</b> |
| <i>Se</i>     |             | <b>2,884,709</b>     | <b>1,912,165</b>  | <b>108,000</b>    | <b>1,324</b>       | <b>26,208</b>        | <b>23,423.3</b>     | <b>3,847.7</b>      | <b>1.8</b>         |                                                                        | <b>-</b>    | <b>1.9</b>   | <b>1.6</b>  | <b>0.4</b>  |            |

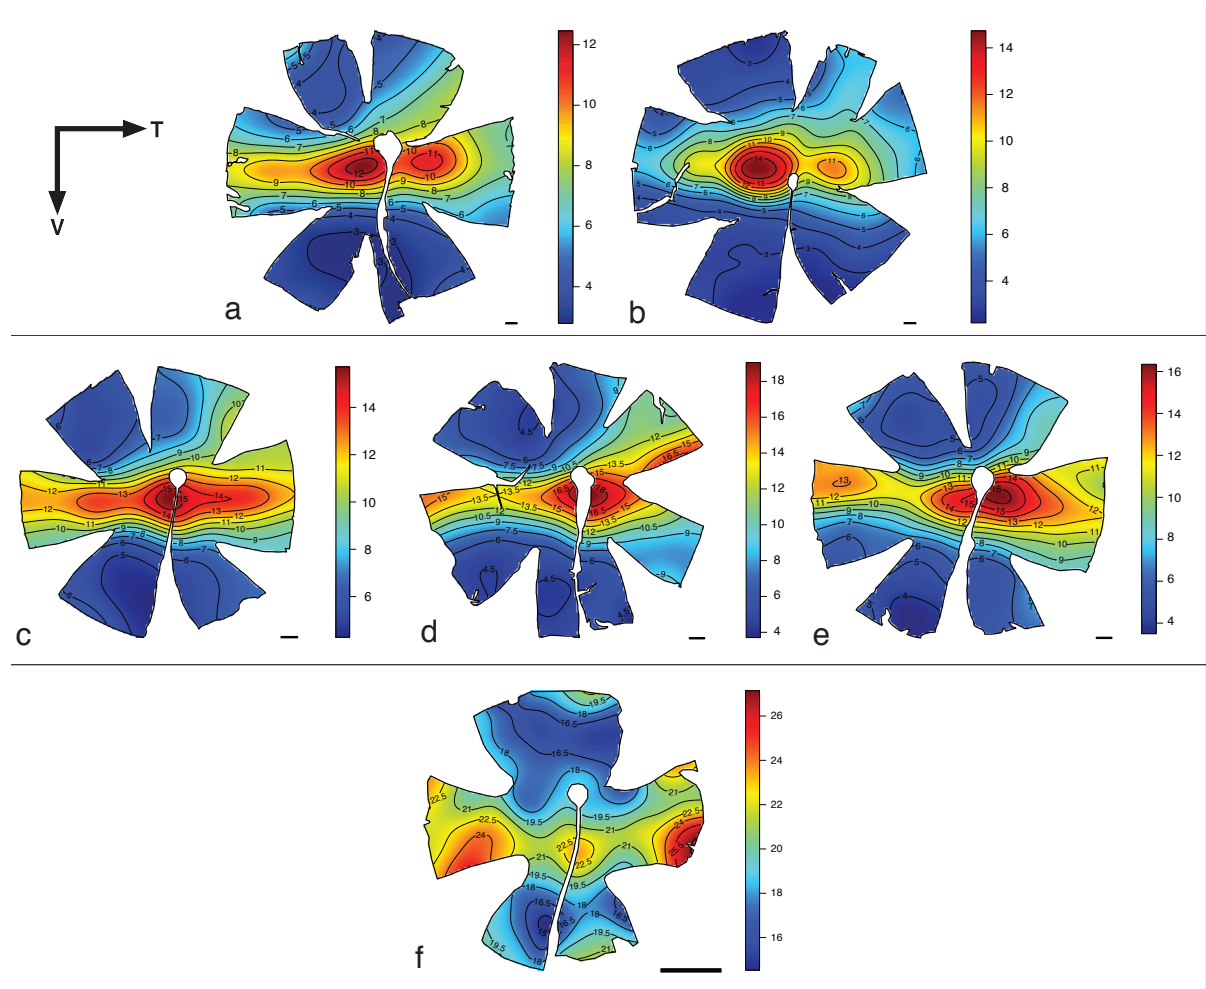

**Fig. S1: Topographic distribution of retinal ganglion cells for adult (a, b), juvenile (c, d, e), and larval (f) stages.** Black lines represent isodensity contours, and values are expressed in densities  $\times 10^3$  cells/mm<sup>2</sup>. V = Ventral, T = temporal. Scale bar = 1 mm.

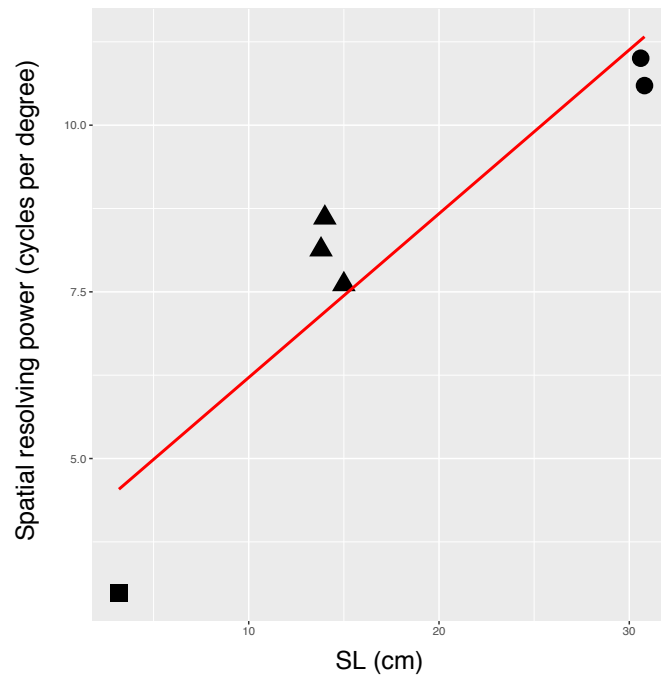

**Fig. S2** Relationship between visual acuity (spatial resolving power) and body size (standard length, SL) for different life stages of *Naso brevirostris*. Squares = larval stage; triangles = juvenile stage; circles = adult stage.

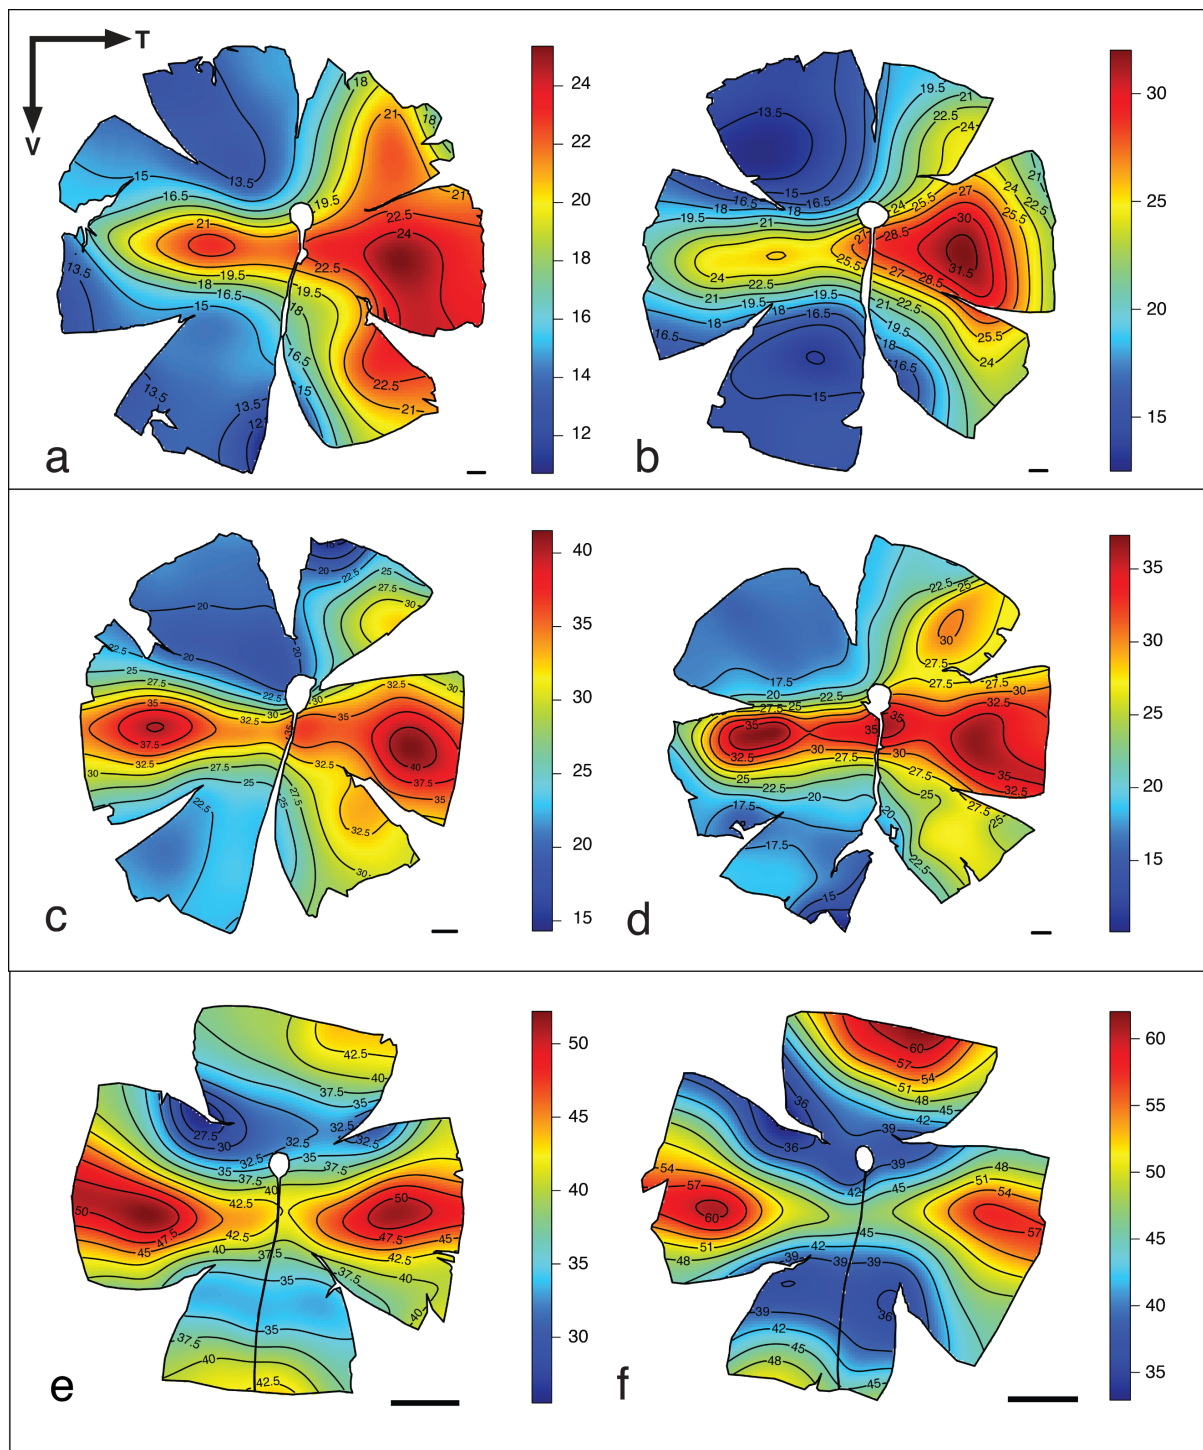

**Fig. S3: Topographic distribution of total cone photoreceptors for adult (a, b), juvenile (c, d), and larval (e, f) stages.** The topographic maps for single and double cones for all individuals are provided on Dryad. Black lines represent isodensity contours, and values are expressed in densities  $\times 10^3$  cells/mm<sup>2</sup>. V = Ventral, T = temporal. Scale bar = 1 mm.

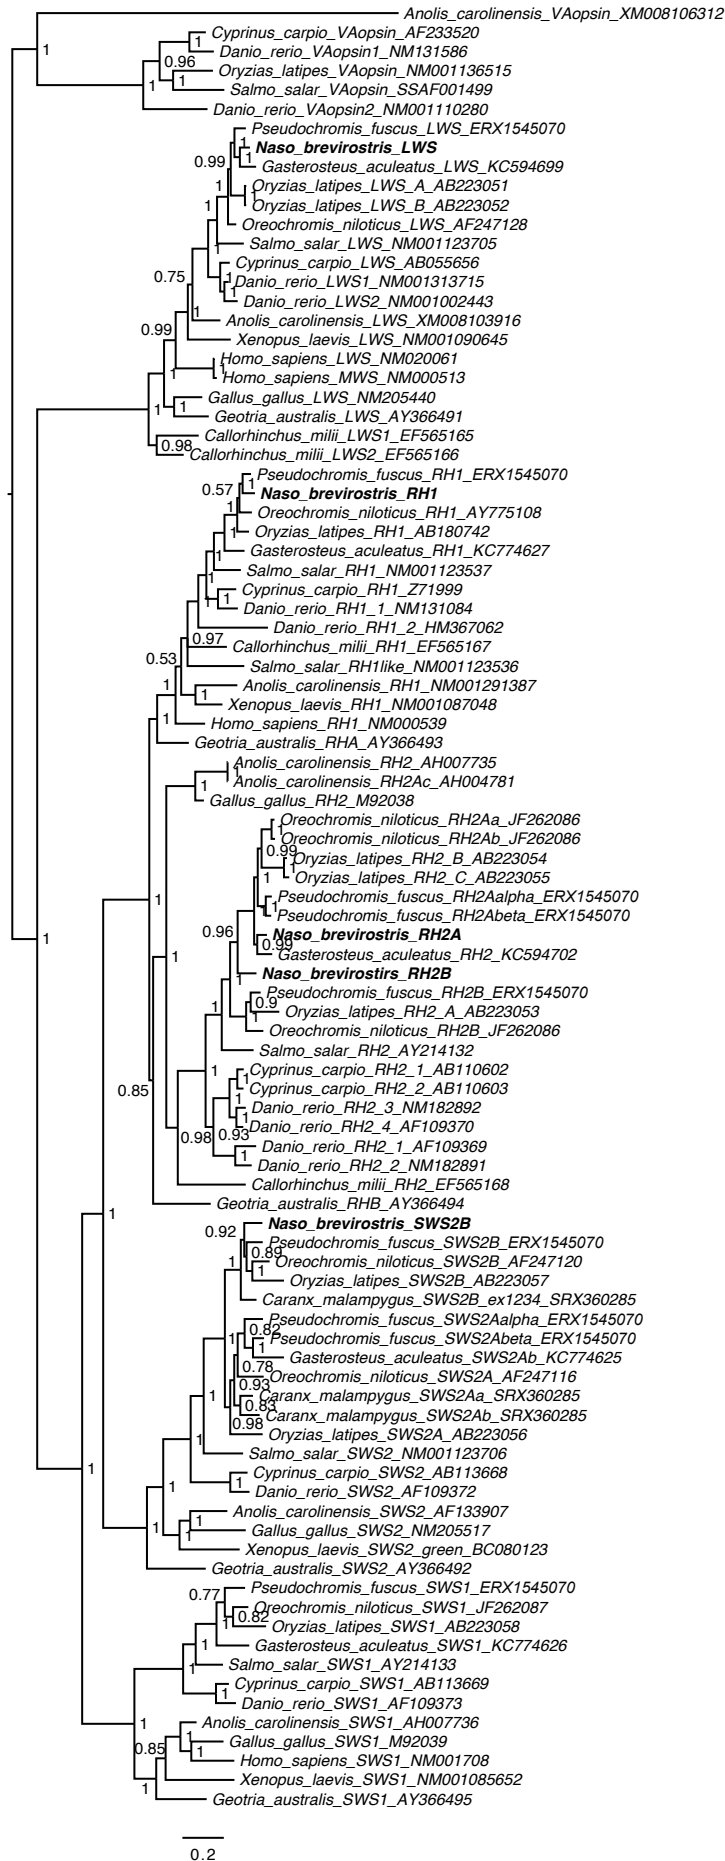

**Fig. S4: Vertebrate opsin phylogeny.** The different *Naso brevirostris* opsins (extracted from the transcriptomes) are shown in bold. Bayesian support values as indicated. *RH1* = rhodopsin 1 (rod opsin), *RH2* = rhodopsin 2, *SWS2* = short-wavelength-sensitive 2, *SWS1* = short-wavelength-sensitive 1, *LWS* = long-wavelength-sensitive, *va* = vertebrate ancient opsin (outgroup), scalebar = substitution per site.
